# Supplementary material
Source: Springer Nature journal article supplement (https://www.springermedizin.de/resource/supplementary/13011_2010_152_MOESM5_ESM.pdf/9628522)

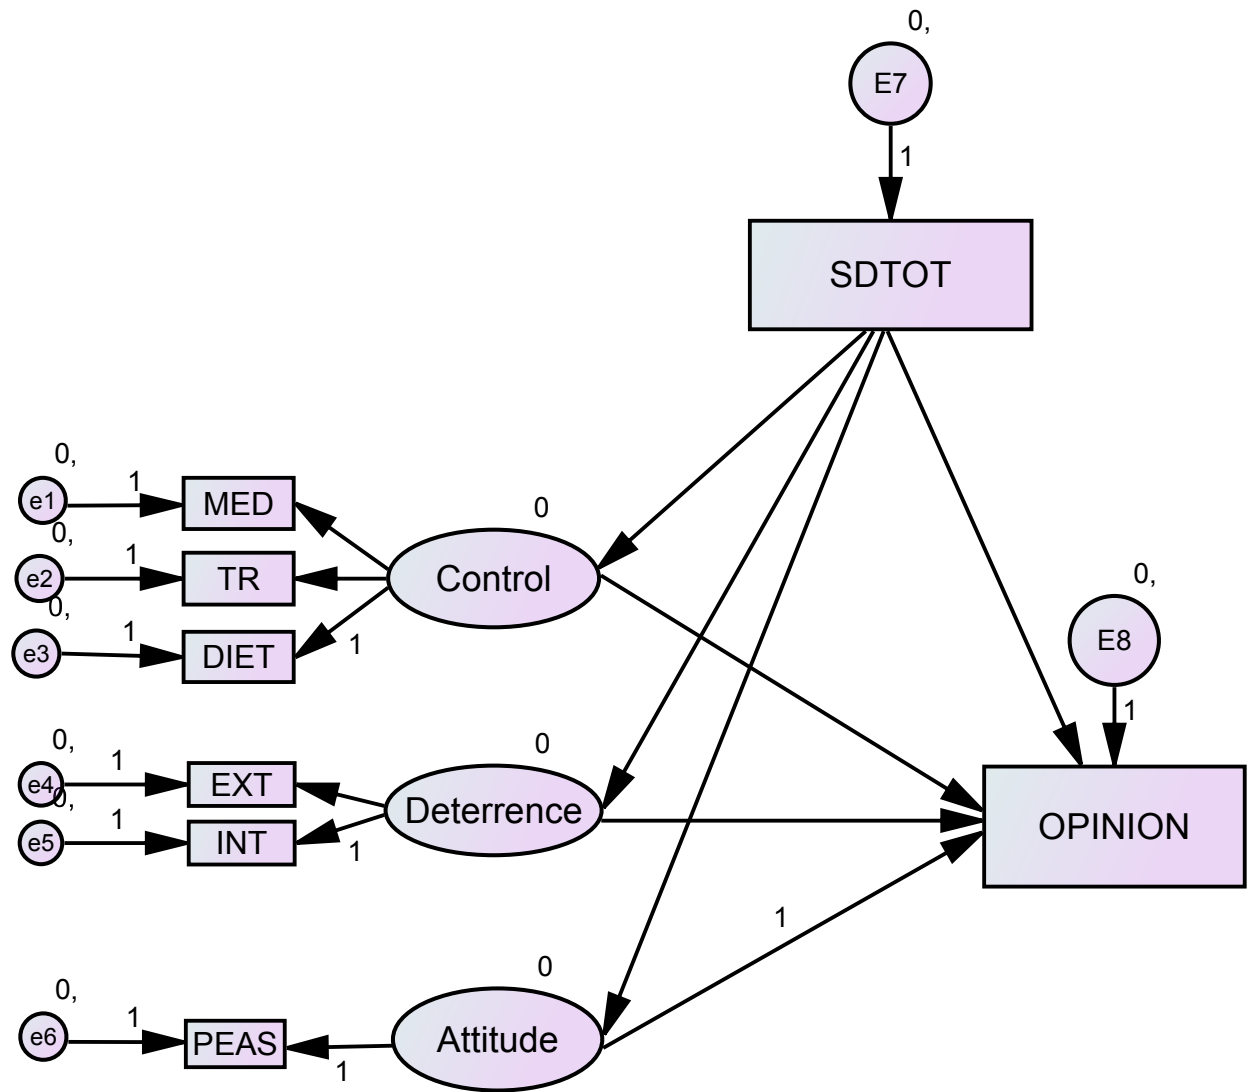

Supplement: MOESM5 [file 9628522]
